# Supplementary material for: Structural Basis of Teneurin-Latrophilin Interaction in Repulsive Guidance of Migrating Neurons
Source: PubMed Central journal article supplement (PMC6978801; doi:10.1016/j.cell.2019.12.014), 2020-01-23
Supplement: mmc1.pdf [file mmc1.pdf]

**Cell, Volume 180**

## **Supplemental Information**

### **Structural Basis of Teneurin-Latrophilin**

#### **Interaction in Repulsive Guidance**

#### **of Migrating Neurons**

**Daniel del Toro, Maria A. Carrasquero-Ordaz, Amy Chu, Tobias Ruff, Meriam Shahin, Verity A. Jackson, Matthieu Chavent, Miguel Berbeira-Santana, Goenuel Seyit-Bremer, Sara Brignani, Rainer Kaufmann, Edward Lowe, Rüdiger Klein, and Elena Seiradake**

| <b>Data collection</b>                   |                                                  |                                               |
|------------------------------------------|--------------------------------------------------|-----------------------------------------------|
| Protein                                  | chicken Ten2 and murine Lphn2 Lec                | chicken Ten2 and murine Lphn1 Lec-Olf         |
| PDB code                                 | 6SKE                                             | 6SKA                                          |
| Space group                              | P1                                               | P4 <sub>3</sub> 22                            |
| Cell dimensions                          |                                                  |                                               |
| a, b, c (Å)                              | 90.87 109.92 152.21                              | 96.26 96.26 809.22                            |
| α, β, γ (°)                              | 90.19 93.99 111.93                               | 90.0 90.0 90.0                                |
| Resolution (Å)                           | 84-3.6 (3.71-3.6)                                | 202-3.86 (4.05-3.86)                          |
| R <sub>meas</sub>                        | 0.334 (212)                                      | 0.556 (3.46)                                  |
| I/σ(I)                                   | 3.47 (0.56)                                      | 6.19 (1.41)                                   |
| Highest resolution shell with I/σ(I) > 2 | 4.49 - 4.33 (R <sub>meas</sub> of shell = 0.532) | 4.31-4.22 (R <sub>meas</sub> of shell = 1.87) |
| CC <sub>1/2</sub>                        | 0.97 (0.25)                                      | 0.99 (0.45)                                   |
| Completeness (%)                         | 96 (96)                                          | 91.2 (36.2)                                   |
| Redundancy                               | 1.8 (1.8)                                        | 12.8 (13.7)                                   |
| <b>Refinement</b>                        |                                                  |                                               |
| Resolution (Å)                           | 84-3.6 (3.64-3.6)                                | 52-3.86 (3.98-3.86)                           |
| R <sub>work</sub> /R <sub>free</sub> *   | 0.27/0.27 (0.28/0.28)                            | 0.26/0.26 (0.25/0.28)                         |
| No of atoms                              |                                                  |                                               |
| protein                                  | 29198                                            | 17313                                         |
| other                                    | 580                                              | 305                                           |
| solvent                                  | 210                                              | -                                             |
| mean B-values (Å <sup>2</sup> )          | 99.4                                             | 134                                           |
| Ramachandran plot                        |                                                  |                                               |
| favoured (%)                             | 96.5                                             | 95.21                                         |
| outliers (%)                             | 0.24                                             | 0.64                                          |
| Bond length deviations (Å)               | 0.007                                            | 0.007                                         |
| Bond angle deviations (°)                | 0.97                                             | 0.95                                          |

**Table S1 related to Figure 1.** Crystallographic statistics for deposited structures 6SKE and 6SKA.

| Ligand - Analyte                                 | Apparent $K_D$ | RU analyte immobilised | Bmax | $R^2$ |
|--------------------------------------------------|----------------|------------------------|------|-------|
| mLphn3 <sup>ecto</sup> - mTen2 <sup>ecto</sup>   | 490 nM         | 730                    | 874  | 0.995 |
| mLphn2 <sup>ecto</sup> - mTen2 <sup>ecto</sup>   | 100 nM         | 700                    | 750  | 0.971 |
| mLphn1 <sup>ecto</sup> - mTen2 <sup>ecto</sup>   | 35 nM          | 670                    | 1014 | 0.865 |
| mLphn3 <sup>ecto</sup> - gTen2 <sup>ecto</sup>   | 680 nM         | 730                    | 1173 | 0.991 |
| mLphn2 <sup>ecto</sup> - gTen2 <sup>ecto</sup>   | 60 nM          | 700                    | 985  | 0.931 |
| mLphn1 <sup>ecto</sup> - gTen2 <sup>ecto</sup>   | 40 nM          | 670                    | 1160 | 0.872 |
| mLphn1 <sup>Lec-Of</sup> - mTen2 <sup>ecto</sup> | 290 nM         | 220                    | 473  | 0.991 |
| mLphn1 <sup>Lec-Of</sup> - gTen2 <sup>ecto</sup> | 590 nM         | 220                    | 631  | 0.999 |

**Table S2 related to Figure 2.** Apparent binding affinities calculated from SPR measurements using Latrophilin and Teneurin constructs are shown. Here we use the following nomenclature for brevity: gTen2 = chicken Ten2, mTen2= murine Ten2, mLphn = murine Lphn. The construct boundaries and mutant types are indicated in superscript.  $K_D$  and  $R_{max}$  values were obtained by nonlinear curve fitting of a 1:1 Langmuir interaction model ( $bound = R_{max}/(K_D + C)$ , where C is analyte concentration calculated as a monomer. Note that Teneurin protein is dimeric and so these values are indicative only. All Ten<sup>ecto</sup> proteins were injected at the same molar concentrations. As done previously (Brasch et al., 2018; Dionne et al., 2018), the comparison of the resulting raw binding curves (Fig. 2G-H and S2C-E) is a more reliable way to assess relative binding.
